# Supplementary material
Source: PubMed Central journal article supplement (PMC9883264)

Fig. 1F

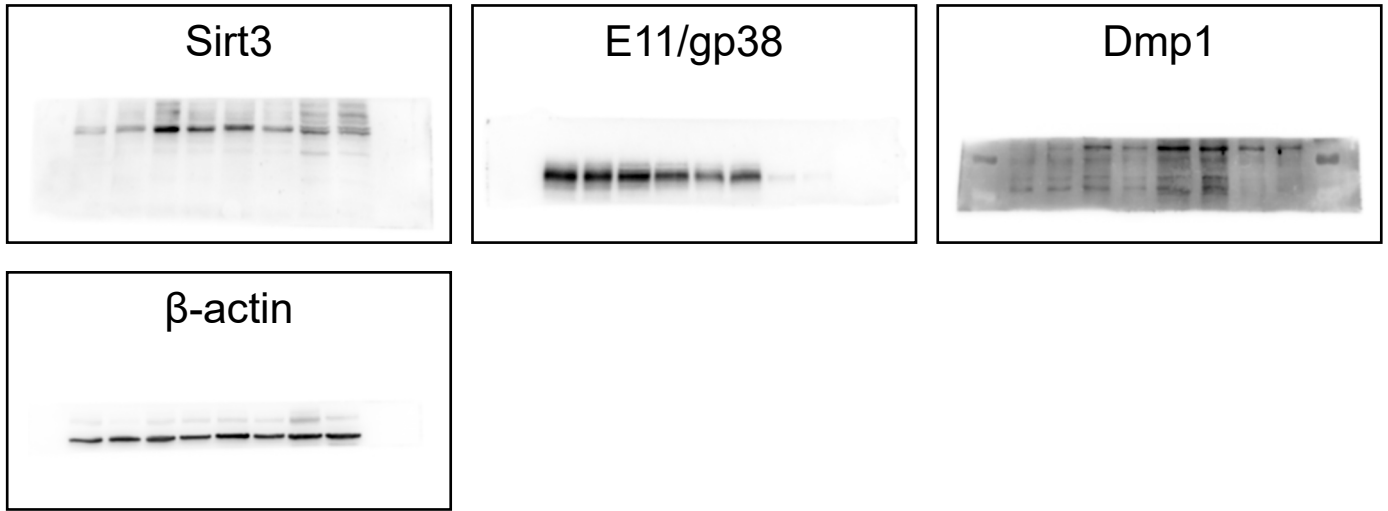

Fig. 2C

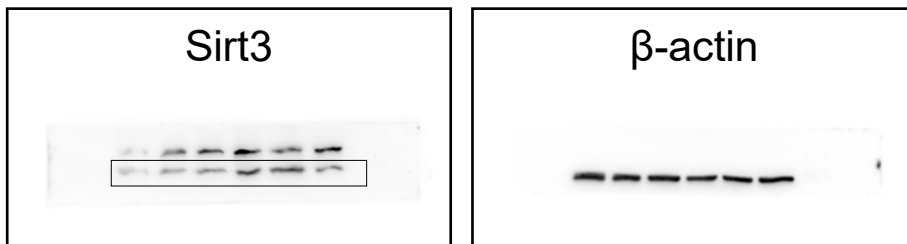

Fig. 5B

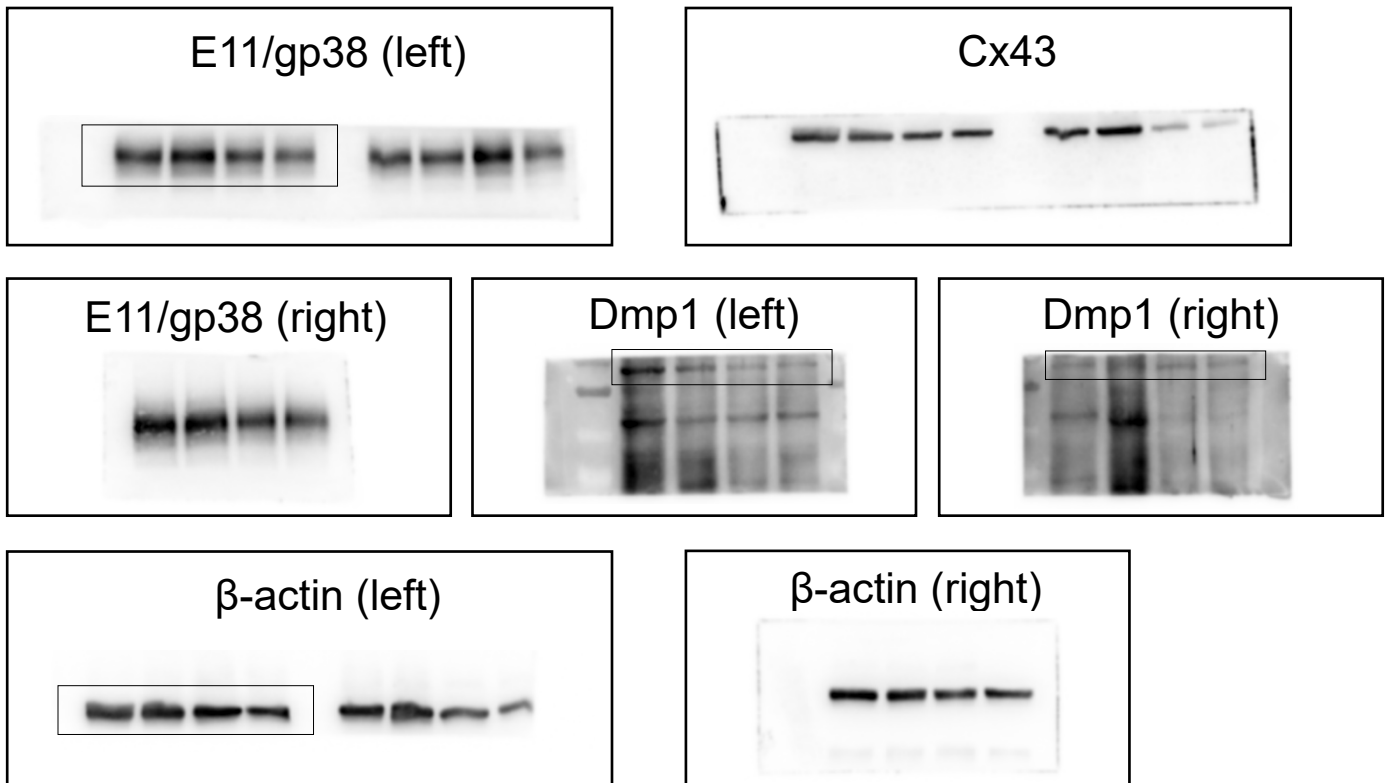

Fig.5C

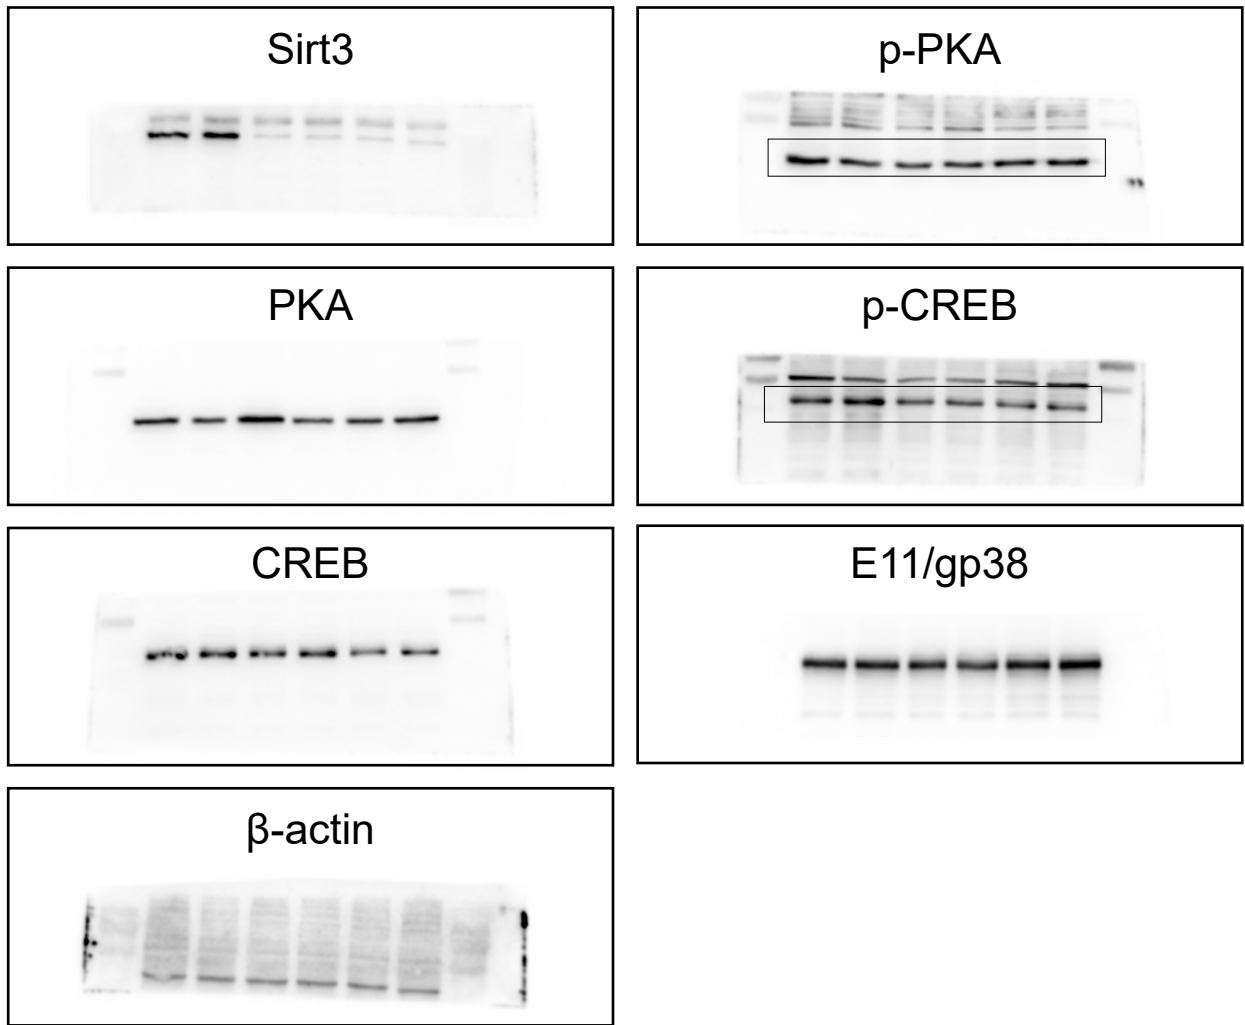

Fig.6A

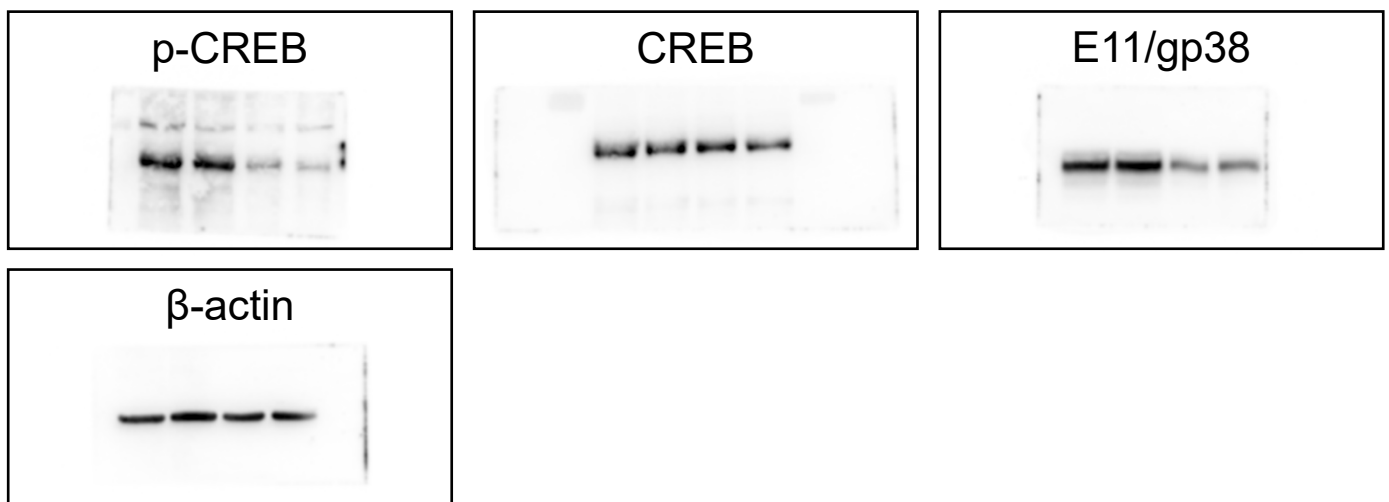

Fig. 7F

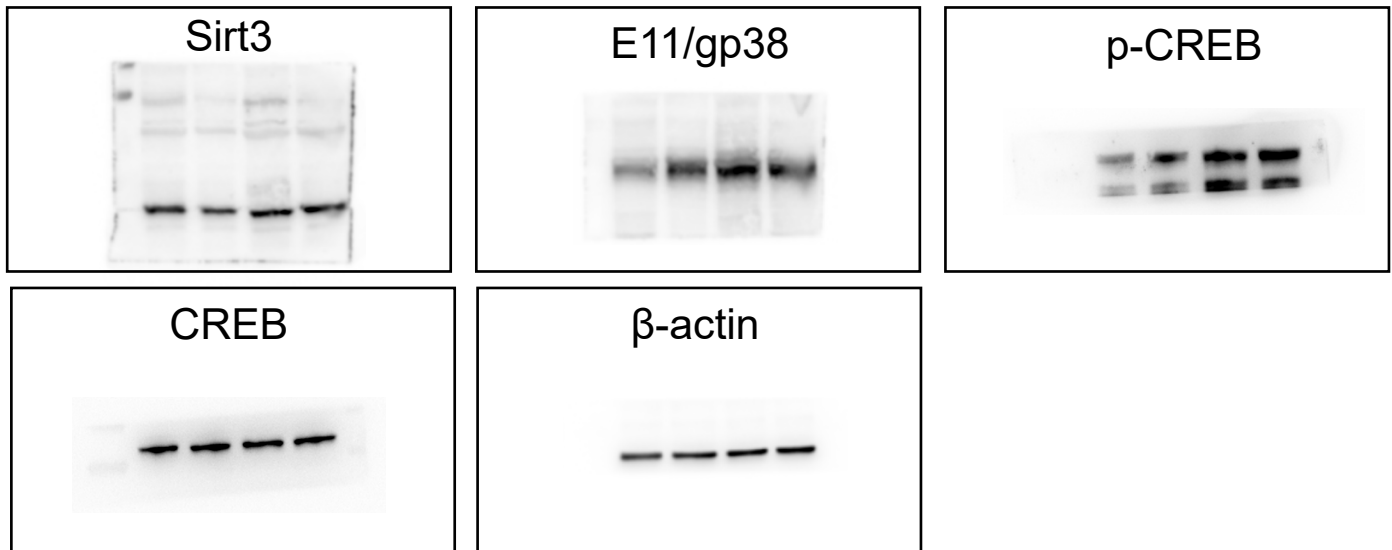

Fig.7G

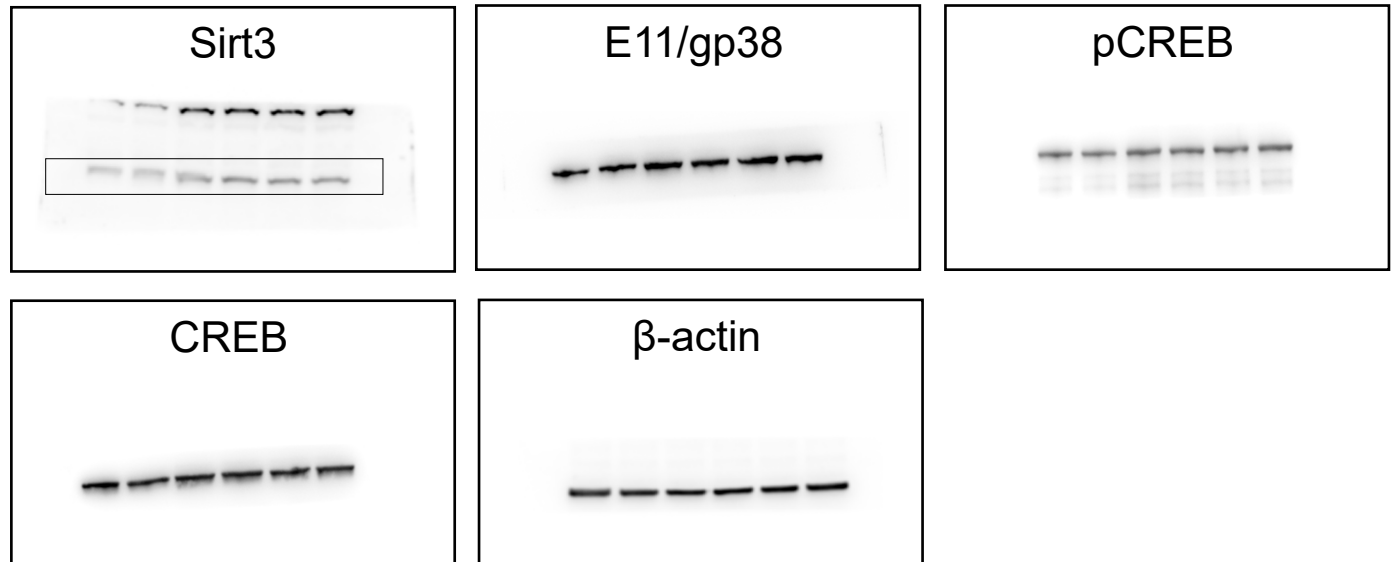

Supplementary Fig. 2B

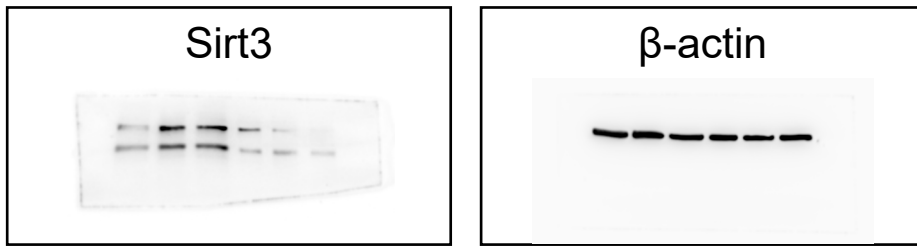

Supplementary Fig. 6D

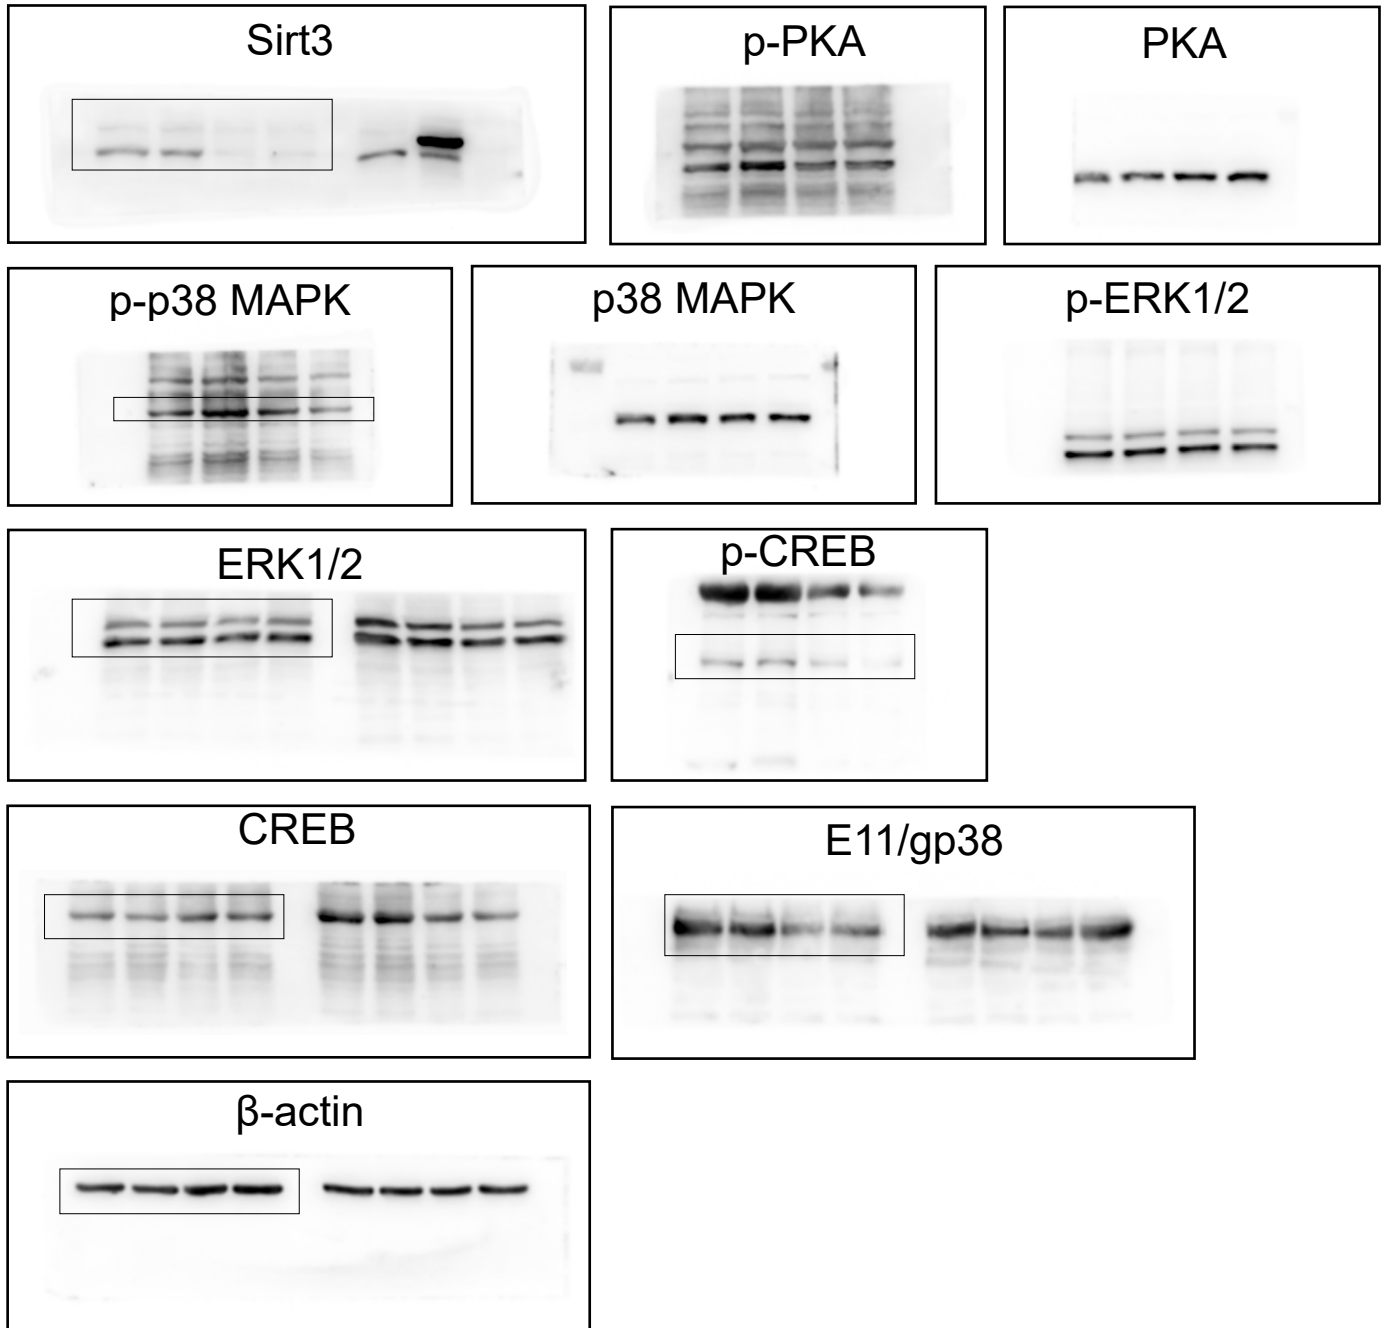

Supplement: 41418_2022_1053_MOESM11_ESM.pdf [file 41418_2022_1053_MOESM11_ESM.pdf]
